1 **ACCELEROMETER-BASED SEDENTARY BEHAVIOUR AND PHYSICAL ACTIVITY ARE**  
2 **ASSOCIATED WITH THE GUT MICROBIOTA IN 8507 INDIVIDUALS FROM THE**  
3 **POPULATION-BASED SCAPIS**

4 Gabriel Baldanzi<sup>1</sup>, Sergi Sayols-Baixeras<sup>1,2</sup>, Elin Ekblom-Bak<sup>3</sup>, Örjan Ekblom<sup>3</sup>, Koen F. Dekkers<sup>1</sup>, Ulf  
5 Hammar<sup>1</sup>, Diem Nguyen<sup>1</sup>, Shafqat Ahmad<sup>1,4</sup>, Ulrika Ericson<sup>5</sup>, Daniel Arvidsson<sup>6</sup>, Mats Börjesson<sup>7,8</sup>, Peter  
6 J. Johanson<sup>9,10</sup>, J Gustav Smith<sup>11,12,13</sup>, Göran Bergström<sup>14,15</sup>, Lars Lind<sup>16</sup>, Gunnar Engström<sup>5</sup>, Johan  
7 Ärnlov<sup>17,18</sup>, Beatrice Kennedy<sup>1</sup>, Marju Orho-Melander<sup>5</sup>, Tove Fall<sup>1</sup>

8

9 <sup>1</sup>Department of Medical Sciences, Molecular Epidemiology and Science for Life Laboratory, Uppsala  
10 University, Uppsala, Sweden.

11 <sup>2</sup>CIBER Cardiovascular diseases (CIBERCV), Instituto de Salud Carlos III, Madrid, Spain.

12 <sup>3</sup>Department of Physical Activity and Health, The Swedish School of Sport and Health Sciences,  
13 Stockholm, Sweden.

14 <sup>4</sup>Preventive Medicine Division, Harvard Medical School, Brigham and Women's Hospital, Boston, MA,  
15 United States.

16 <sup>5</sup>Department of Clinical Sciences in Malmö, Lund University, Malmö, Sweden.

17 <sup>6</sup>Center for Health and Performance, Department of Food and Nutrition, and Sport Science, University of  
18 Gothenburg, Gothenburg, Sweden.

19 <sup>7</sup>Center for Lifestyle Intervention, Department of Molecular and Clinical Medicine, University of  
20 Gothenburg, Gothenburg, Sweden.

21 <sup>8</sup>Department of Medicine, Geriatric and Acute Medicine Östra, Sahlgrenska University Hospital,  
22 Gothenburg, Sweden.

23 <sup>9</sup>Department of Medical Sciences, Occupational and Environmental Medicine, Uppsala University,  
24 Uppsala, Sweden.

25 <sup>10</sup>Occupational and Environmental Medicine, Uppsala University Hospital, Uppsala, Sweden.

26 <sup>11</sup>The Wallenberg Laboratory/Department of Molecular and Clinical Medicine, Institute of Medicine,  
27 Gothenburg University and the Department of Cardiology, Sahlgrenska University Hospital, Gothenburg,  
28 Sweden;

29 <sup>12</sup>Department of Cardiology, Clinical Sciences, Lund University and Skåne University Hospital, Lund,  
30 Sweden;

31 <sup>13</sup>Wallenberg Center for Molecular Medicine and Lund University Diabetes Center, Lund University,  
32 Lund, Sweden;

33 <sup>14</sup>Department of Molecular and Clinical Medicine, Institute of Medicine, Sahlgrenska Academy,  
34 University of Gothenburg, Gothenburg, Sweden.

35 <sup>15</sup>Department of Clinical Physiology, Sahlgrenska University Hospital, Region Västra Götaland,  
36 Gothenburg, Sweden.

37 <sup>16</sup>Department of Medical Sciences, Clinical Epidemiology, Uppsala University, Uppsala, Sweden

38 <sup>17</sup>Division of Family Medicine and Primary Care, Department of Neurobiology, Care Science and Society,  
39 Karolinska Institutet, Huddinge, Sweden.

40 <sup>18</sup>School of Health and Social Studies, Dalarna University, Falun, Sweden.

41

42 Correspondence to: Tove Fall, PhD, Professor in Molecular Epidemiology, Dept. of Medical Sciences,  
43 Uppsala University, EpiHubben, MTC-huset, 75185, Uppsala, Sweden. E-mail: [tove.fall@medsci.uu.se](mailto:tove.fall@medsci.uu.se)

#### 44 **ABSTRACT**

45 **Objective:** Population-based studies investigating the relationship between physical activity and the gut  
46 microbiota composition have mainly relied on self-reported activity, potentially influenced by reporting  
47 bias. Here, we investigated associations of accelerometer-based sedentary behaviour and physical activity  
48 with the gut microbiota composition and functional profile in the large Swedish CARDioPulmonary  
49 bioImage Study.

50 **Methods:** In 8507 participants aged 50-65, the proportion of time in sedentary (SED), moderate-intensity  
51 (MPA), and vigorous-intensity (VPA) physical activity were estimated with hip-worn accelerometer. The  
52 gut microbiota was profiled using shotgun metagenomics of fecal samples. We fitted multivariable  
53 regression models, and adjusted for sociodemographic, lifestyle, and technical covariates while also  
54 accounting for multiple testing.

55 **Results:** Overall, SED and MPA were associated with microbiota species in opposite directions. For  
56 example, the strongest positive regression coefficient for MPA and the strongest negative for SED were  
57 with *Prevotella copri*, a plant-polysaccharide-degrading bacteria. Species associated with VPA aligned  
58 with the MPA associations, although with clear discrepancies. For instance, *Phocaeicola vulgatus* was  
59 negatively associated with MPA, while the association with VPA was non-significant and in the positive  
60 direction. Additional adjustment for dietary variables or adiposity attenuated some of the associations. For  
61 the functional profile, MPA and VPA were generally associated with lower capacity for amino acid  
62 degradation.

63 **Conclusion:** Our findings suggest that sedentary behaviour and physical activity are associated with a  
64 similar set of gut microbiota species and functions, but in opposite directions. Furthermore, the intensity  
65 of physical activity may have specific effects on certain species of the gut microbiota.

66 Word count: 247/250

## 67 INTRODUCTION

68 Physical activity has well-established health benefits, including reduced risk for cardiovascular disease,  
69 type 2 diabetes,<sup>1,2</sup> and psychiatric conditions like depression.<sup>3</sup> Conversely, sedentary behaviour, defined  
70 as sitting or non-sleep lying activities with low energy expenditure, is associated with increased risk of  
71 type 2 diabetes and cardiovascular mortality.<sup>4-6</sup> Some studies have though indicated that the risks  
72 attributed to sedentary behaviour could be substantially attenuated by physical activity at high  
73 intensities.<sup>7-9</sup>

74 The gut microbiota is a community of microorganisms within the gastrointestinal tract that  
75 interacts with the host.<sup>10</sup> Evidence suggests that the gut microbiota plays a role in the development of type  
76 2 diabetes and cardiovascular diseases.<sup>11-13</sup> Moreover, the gut microbiota may influence brain homeostasis  
77 through the microbiota-gut-brain axis, which includes microbe-produced neurotransmitters and other  
78 molecules that can affect the central nervous system via neuronal pathways or the immune system.<sup>14</sup>

79 Regular physical activity may affect the gut microbiota through various mechanisms, including  
80 modulation of the gut immune system, reduction in the intestinal transit time<sup>15</sup> and splanchnic blood flow,  
81 transient increase in the intestinal permeability,<sup>16</sup> and modulation of the enterohepatic circulation of bile  
82 acids.<sup>17</sup> Smaller intervention studies in specific populations have reported changes to the gut microbiota  
83 composition after structured exercise, with a decrease in *Clostridium* and *Blautia* and an increase in  
84 *Bifidobacterium* and *Dorea*.<sup>18-20</sup> In population-based studies, self-reported moderate and vigorous-  
85 intensity physical activity have been associated with higher gut microbiota diversity<sup>21</sup>, and sedentary  
86 behaviour with increased abundance of *Roseburia hominis* and *Erysipelatoclostridium* species.<sup>22</sup>  
87 However, these studies had limited microbiota taxonomic resolution and used self-reported physical  
88 activity information, which may be affected by reporting bias.<sup>23</sup> Therefore, there is a need for larger  
89 population-based studies that combine sensor-based physical activity assessment with gut microbiota  
90 profiled in higher taxonomic resolution. Here, we aimed to identify associations of accelerometer-based  
91 sedentary behaviour and physical activity with the gut microbiota analysed with deep shotgun  
92 metagenomics, in 8507 participants, using cross-sectional data from the Swedish CARDioPulmonary  
93 BioImage Study (SCAPIS).

## 94 METHODS

### 95 Study Population

96 The SCAPIS cohort includes 30 154 women and men aged 50 to 65 enrolled between 2013 and 2018 from  
97 six different regions in Sweden.<sup>24</sup> Baseline investigation included wear of a hip-accelerometer for 7 days.

98 Participants from Malmö and Uppsala were also invited to provide faecal samples for metagenomic  
99 analysis (n = 9831). The Swedish Ethical Review Authority approved the SCAPIS study (DNR 2010-228-  
100 31M) and the present study (DNR 2018-315 with amendment 2020-06597). All participants provided  
101 written informed consent.

102

### 103 **Accelerometer data processing**

104 Accelerometer data was processed using a previously described protocol<sup>25</sup> with the added exclusion of  
105 registrations during estimated bedtime. For details, see supplemental methods. In brief, participants were  
106 instructed to wear the ActiGraph (Pensacola, USA) tri-axial accelerometer over the hip for 7 consecutive  
107 days, except during sleep and water-based activities. Raw data was transformed into counts per minute  
108 (cpm) over 60s epochs. Sedentary time (SED), low-intensity physical activity (LIPA), moderate-intensity  
109 physical activity (MPA), and vigorous-intensity physical activity (VPA) were defined as <200 cpm, 200  
110 – 2689 cpm, 2690 – 6166 cpm, and  $\geq 6167$  cpm, respectively. Non-wear time was defined as periods of  
111  $\geq 60$  min with zero counts, with intervals of maximum two minutes of 0 – 199 cpm. A valid day was  
112 defined as a day with >10 hours of wear time. We excluded 467 participants who had <4 valid days. The  
113 percentage of time in SED, MPA, or VPA were calculated by dividing the time spent in each activity by  
114 the total wear time.<sup>25</sup> Because SED and LIPA were highly negatively correlated (Spearman's correlation  
115 = -0.95, supplemental figure 1), we chose to exclude LIPA from the subsequent analyses.

116

### 117 **Faecal metagenomics**

118 The gut microbiota was assessed through metagenomic analyses of faecal samples using a previously  
119 described protocol.<sup>26</sup> In summary, faecal samples were collected at home, kept in the home freezer until  
120 the second study visit, and stored at -80°C until shipped to Clinical Microbiomics A/S (Copenhagen,  
121 Denmark) for DNA extraction, library preparation, sequencing with Illumina Novaseq 6000 (Illumina, CA,  
122 USA), bioinformatics processing, and taxonomic annotation. Metagenomic species were defined by  
123 binning of co-abundance genes, as previously described.<sup>27</sup> Alpha diversity, a metric of the diversity of  
124 species and the homogeneity of their abundance within a sample<sup>28</sup> was estimated using the Shannon  
125 diversity index. Beta diversity, a metric of the composition dissimilarity between samples, was estimated  
126 using the Bray-Curtis dissimilarity.<sup>29</sup> These estimations were performed with R package *vegan* on  
127 sequence data that was rarefied to 210 430 read-pairs for all samples to account for the differences in  
128 sequencing depth. The functional potential of the gut microbiota was defined by the abundance of genes

129 of the manually curated gut metabolic modules<sup>30</sup> (GMM) and microbiota-gut-brain modules<sup>14</sup> (MGB).  
130 GMMs capture the microbiota metabolic potential and anaerobic fermentation capacity<sup>30</sup>, while MGBs  
131 comprise the capacity to degrade or produce potentially neuroactive compounds.<sup>14</sup> To calculate the  
132 abundance of respective modules, we used the R package Omixer-RPM v.0.3.2<sup>31</sup> considering a minimum  
133 module coverage of 66.6%. Analyses were focused on species identity, GMMs, and MGBs with a relative  
134 abundance >0.01% in  $\geq 1\%$  of individuals, resulting in 1336 species, 76 GMMs, and 28 MGBs for further  
135 analysis. Before statistical analysis, species, GMM, and MGB were  $\log(x+1)$  transformed, where  $x$   
136 denotes the relative abundance. For details, see supplemental methods.

137

### 138 **Covariates**

139 Covariate information was obtained from the SCAPIS questionnaire, and anthropometric measurements  
140 and fasting plasma samples collected during study site visit. Mean daily intake of alcohol, fibre, added  
141 sugar, protein, carbohydrate, fat, and total energy were estimated from the food frequency  
142 questionnaire.<sup>32,33</sup> Fibre, protein, carbohydrate, fat, and added sugar intake were transformed to  
143 percentages of non-alcohol energy intake. We categorized smoking status as current, former, or non-  
144 smoker, and highest achieved education level as incomplete compulsory, complete compulsory,  
145 secondary, or university education. Country of birth was grouped as Scandinavia (Sweden, Denmark,  
146 Norway, or Finland), non-Scandinavian Europe, Asia, and other countries. Information on medications  
147 prescribed for hypertension, type 2 diabetes, dyslipidaemia, depression, and anxiety within six months  
148 before the first site visit was retrieved from the Swedish Prescribed Drug Register (supplemental  
149 methods). Proton-pump inhibitor usage was defined as a measurable level of omeprazole or  
150 pantoprazole metabolites in plasma. Antibiotic use was defined as a dispensed prescription (Anatomical  
151 Therapeutic Chemical code J01) up to three months before the first visit.

### 152 **Statistical method**

153 *Model specification.* Based on current literature<sup>21,25,34</sup>, we created a directed acyclic graph prior to the  
154 analysis phase using the DAGitty tool ([www.daggitty.net](http://www.daggitty.net), supplemental figure 2), and selected potential  
155 confounders for the main model based on the d-separation criteria.<sup>35</sup> The main model comprised age, sex,  
156 alcohol intake, smoking, education, country of birth, study site, and month of accelerometer wear. We  
157 also adjusted for technical variation covariates including total wear time, percentage of wear time on  
158 weekend, and faecal DNA extraction plate. To identify associations independent of dietary intake or

159 adiposity, we explored two additional models: (1) Diet-adjusted model: additional adjustment for total  
160 energy intake and intake from added sugars, proteins, carbohydrates, and fibre, or (2) BMI/WHR-adjusted  
161 model: additional adjustment for body mass index (BMI) and waist-hip ratio (WHR). Statistical analyses  
162 were conducted in R version 4.1.1 (<http://www.r-project.org>).

163 *Alpha and beta diversity.* For alpha diversity, we applied linear regression models with Shannon  
164 index as the dependent variable and SED, MPA, and VPA separately as independent variables, while  
165 adjusting for covariates. Regression coefficients presented represent standard-deviation changes in SED,  
166 MPA, or VPA. For beta diversity, we used distance-based redundancy analysis to estimate the proportion  
167 of the interindividual gut microbiota dissimilarity explained by SED, MPA, and VPA. The analyses  
168 accounted for the covariates by using the parameter “condition” in the function “capscale” (R package  
169 *vegan*) and p-values were calculated based on 9999 permutations.

170 *Species, gut metabolic modules, and microbiota-gut-brain modules.* To identify microbiota  
171 features associated with physical activity overall, we applied a series of linear regression models with each  
172 species, GMM, and MGB introduced as the dependent variable, and SED, MPA, and VPA jointly  
173 introduced as independent variables together with the main model covariates. We used the likelihood ratio  
174 test to compare these models to an alternative model that only contained the covariates. To control for  
175 multiple testing, we applied the Benjamini-Hochberg method with a 5% false discovery rate and reported  
176 significance as q-values.<sup>36</sup> The species, GMMs, and MGBs identified (q-value <0.05) were subsequently  
177 evaluated in models where SED, MPA, and VPA were introduced separately as an independent variable  
178 while adjusting for main model covariates, as well as for the diet-adjusted model and the BMI/WHR-  
179 adjusted model. To identify associations potentially caused by single influential observations, we  
180 calculated dfbetas for the main model. If removing the observation with the highest dfbeta resulted in a  
181 change in the direction of the association or a p-value  $\geq 0.05$ , we discarded the association. Lastly,  
182 remaining species were examined in two sensitivity analyses: (1) additional adjustment for use of proton-  
183 pump inhibitors and medication for hypertension, type 2 diabetes, dyslipidaemia, anxiety, and/or  
184 depression; (2) exclusion of participants that were prescribed antibiotic treatment within the last three  
185 months.

## 186 **RESULTS**

### 187 **Study population**

188 The study population consisted of 4197 participants from Malmö and 4310 participants from Uppsala with  
 189 valid accelerometer data, faecal metagenomics data, and complete information on the main model  
 190 covariates (Table 1).

191  
 192 **Table 1. Characteristics of the study population stratified by study site.**

|                                                | All              | Malmö            | Uppsala          |
|------------------------------------------------|------------------|------------------|------------------|
|                                                | N=8507           | N=4197           | N=4310           |
| <b>Age, years</b>                              | 57.6 [53.8;61.4] | 57.4 [53.7;61.2] | 57.8 [53.9;61.5] |
| <b>Women, N (%)</b>                            | 4533 (53.3%)     | 2278 (54.3%)     | 2255 (52.3%)     |
| <b>Accelerometer:</b>                          |                  |                  |                  |
| <b>Wear time in sedentary, %</b>               | 55.5 [48.5;62.0] | 55.6 [48.7;62.3] | 55.4 [48.4;61.7] |
| <b>Wear time in moderate-intensity, %</b>      | 4.7 [3.2;6.6]    | 4.3 [2.8;6.3]    | 5.1 [3.6;6.9]    |
| <b>Wear time in vigorous-intensity, %</b>      | 0.06 [0.00;0.48] | 0.03 [0.00;0.37] | 0.10 [0.02;0.61] |
| <b>Valid days, days</b>                        | 7 [6;7]          | 7 [6;7]          | 7 [7;7]          |
| <b>Wear time/day, h</b>                        | 14.5 [13.7;15.4] | 14.1 [13.3;14.8] | 15.0 [14.1;16.0] |
| <b>Wear time registered during weekends, %</b> | 28.6 [28.6;28.6] | 28.6 [28.6;28.6] | 28.6 [28.6;28.6] |
| <b>Alcohol intake, g/day</b>                   | 5.4 [1.8;10.3]   | 5.2 [1.6;10.3]   | 5.6 [1.9;10.2]   |
| <b>Smoking, N (%):</b>                         |                  |                  |                  |
| <b>Never</b>                                   | 4379 (51.5%)     | 1834 (43.7%)     | 2545 (59.0%)     |
| <b>Former</b>                                  | 3046 (35.8%)     | 1650 (39.3%)     | 1396 (32.4%)     |
| <b>Current</b>                                 | 1082 (12.7%)     | 713 (17.0%)      | 369 (8.6%)       |
| <b>Education, N (%):</b>                       |                  |                  |                  |
| <b>Compulsory<sup>a</sup></b>                  | 784 (9.2%)       | 462 (11.0%)      | 322 (7.5%)       |
| <b>Upper secondary</b>                         | 3790 (44.6%)     | 1998 (47.6%)     | 1792 (41.6%)     |
| <b>University</b>                              | 3933 (46.2%)     | 1737 (41.4%)     | 2196 (51.0%)     |
| <b>Country of birth, N (%):</b>                |                  |                  |                  |
| <b>Scandinavia<sup>b</sup></b>                 | 7183 (84.4%)     | 3308 (78.8%)     | 3875 (89.9%)     |
| <b>Europe</b>                                  | 752 (8.8%)       | 584 (13.9%)      | 168 (3.9%)       |
| <b>Asia</b>                                    | 382 (4.5%)       | 210 (5.0%)       | 172 (4.0%)       |
| <b>Other</b>                                   | 190 (2.2%)       | 95 (2.3%)        | 95 (2.2%)        |
| <b>BMI and WHR</b>                             |                  |                  |                  |
|                                                | N=8503           | N=4193           | N=4310           |
| <b>BMI, kg/m<sup>2</sup></b>                   | 26.4 [24.0;29.4] | 26.6 [24.1;29.6] | 26.3 [24.0;29.1] |
| <b>Waist-hip ratio</b>                         | 0.9 [0.9;1.0]    | 0.9 [0.8;1.0]    | 0.9 [0.9;1.0]    |
| <b>Dietary variables</b>                       |                  |                  |                  |
|                                                | N=8416           | N=4144           | N=4272           |
| <b>Total energy intake (kcal/day)</b>          | 1594 [1239;2049] | 1572 [1221;2059] | 1611 [1268;2040] |

|                                              |                  |                  |                  |
|----------------------------------------------|------------------|------------------|------------------|
| <b>Protein, E%</b>                           | 16.6 [14.7;18.6] | 16.5 [14.5;18.7] | 16.7 [15.0;18.6] |
| <b>Carbohydrate, E%</b>                      | 43.8 [39.4;48.0] | 43.9 [39.2;48.2] | 43.8 [39.5;47.9] |
| <b>Fat, E%</b>                               | 37.2 [33.3;41.1] | 37.3 [33.3;41.3] | 37.1 [33.3;40.8] |
| <b>Fibre, E%</b>                             | 2.3 [1.8;2.9]    | 2.3 [1.8;2.9]    | 2.4 [1.9;2.9]    |
| <b>Added Sugar, E%</b>                       | 7.3 [4.9;10.6]   | 7.3 [4.8;10.9]   | 7.2 [5.1;10.3]   |
| <b>Sensitivity analysis – medication use</b> | N=7560           | N=3295           | N=4265           |
| <b>Type 2 diabetes, N (%)</b>                | 301 (4.0%)       | 145 (4.4%)       | 156 (3.7%)       |
| <b>Hypertension, N (%)</b>                   | 1823 (24.1%)     | 830 (25.2%)      | 993 (23.3%)      |
| <b>Dyslipidaemia, N (%)</b>                  | 798 (10.6%)      | 380 (11.5%)      | 418 (9.8%)       |
| <b>Depression, N (%)</b>                     | 786 (10.4%)      | 342 (10.4%)      | 444 (10.4%)      |
| <b>Anxiety, N (%)</b>                        | 278 (3.7%)       | 143 (4.3%)       | 135 (3.2%)       |
| <b>Proton pump inhibitors, N (%)</b>         | 285 (3.8%)       | 155 (4.7%)       | 130 (3.0%)       |
| <b>Sensitivity analysis – antibiotic use</b> | N=8507           | N=4197           | N=4310           |
| <b>Antibiotic last 3 months, N (%)</b>       | 498 (5.9%)       | 270 (6.5%)       | 228 (5.3%)       |

193 Continuous variables described as median and 25<sup>th</sup> and 75<sup>th</sup> percentiles. Categorical variables described  
 194 as absolute numbers and percentages. WHR: Waist-hip ratio. <sup>a</sup> Incomplete or complete compulsory  
 195 education. <sup>b</sup> Sweden, Denmark, Finland or Norway. E%: percentages of non-alcohol energy intake.

196

### 197 **Sedentary behaviour and physical activity associations with alpha diversity and beta diversity**

198 We found that SED was associated with lower alpha diversity ( $\beta = -0.020$ ,  $p\text{-value} = 1.2 \times 10^{-5}$ ), whereas  
 199 MPA and VPA were associated with higher alpha diversity (MPA:  $\beta = 0.024$ ,  $p\text{-value} = 5.5 \times 10^{-8}$ ; VPA:  $\beta$   
 200  $= 0.032$ ,  $p\text{-value} = 1.7 \times 10^{-12}$ ). Similar results were found in the diet-adjusted model. In the BMI/WHR-  
 201 adjusted model, only MPA and VPA were associated with alpha diversity (MPA:  $\beta = 0.017$ ,  $p\text{-value} =$   
 202  $1.3 \times 10^{-4}$ ; VPA:  $\beta = 0.022$ ,  $p\text{-value} = 1.4 \times 10^{-6}$ ).

203 To evaluate the contribution of sedentary behaviour and physical activity on the interindividual  
 204 variation of the gut microbiota composition, we performed distance-based redundancy analysis on the  
 205 Bray-Curtis dissimilarity matrix. After conditioning on the main model covariates, the adjusted  $R^2$  for SED  
 206 was 0.083%, for MPA 0.084%, and for VPA 0.081%. The adjusted  $R^2$  for SED, MPA and VPA jointly  
 207 was 0.188% in the main model, 0.141% in the diet-adjusted model, and 0.154% in the BMI/WHR-adjusted  
 208 model (all  $p\text{-values} = 1 \times 10^{-4}$ ). For comparison, the  $R^2$  for BMI without accounting for other variables was  
 209 0.76%, for fibre intake 0.39%, and for the dietary variables combined 0.69%.

210

211 **Sedentary behaviour and physical activity were associated with a large number of the species**  
 212 **present in the human gut**



213 We identified 345 species associated with physical activity (supplemental table 1). Among these, SED  
214 was associated with 224 species (q-value <0.05), MPA with 245 species, and VPA with 228 species.  
215 However, we found that six associations for SED, 16 associations for MPA, and 31 associations for VPA  
216 were caused by single influential observations (supplemental table 2). Overall, associations for SED and  
217 MPA mirrored each other (figure 1). The Pearson correlation between the main model regression  
218 coefficients for SED and MPA was -0.92, while between SED and VPA was -0.67. Amongst the largest  
219 coefficients, SED was positively, and MPA and VPA were negatively associated with *Blautia obeum*  
220 (unique identifier HG3A.0001) and *Ruminococcus torques*. Additionally, SED was negatively and MPA  
221 was positively associated with *Prevotella copri* and an unclassified *Eubacteriales* species (identifier  
222 HG3A.0100). The largest positive coefficients for VPA were with four unclassified *Eubacteriales* species  
223 (HG3A.0125, HG3A.0100, HG3A.0062, HG3A.0162).

224 Regression coefficients for MPA and VPA were in largely consistent in direction and magnitude  
225 (Pearson correlation = 0.67). However, for specific species, there were marked differences in the  
226 association with MPA or VPA. For instance, *P. copri* and *Faecalibacterium prausnitzii* (HG3A.0025)  
227 were among the largest positive coefficients for MPA, but were not associated with VPA. Other  
228 differences include *Phocaeicola vulgatus* and *Bacteroides uniformis*, which were negatively associated  
229 with MPA, but not with VPA (figure 1).

230 The main model and the diet-adjusted model regression coefficients were highly correlated  
231 (Pearson correlation >0.99 for SED, MPA, and VPA), although generally attenuated in diet-adjusted  
232 model (supplemental table 2 and supplemental figure 3). The BMI/WHR-adjusted model also produced  
233 similar coefficients for MPA and VPA compared to the main model coefficients (Pearson correlation  
234 >0.97). However, regression coefficients for SED from the BMI/WHR model and from the main model  
235 were not as strongly correlated (Pearson correlation = 0.89). Certain main model associations for SED  
236 were substantially attenuated in the BMI/WHI model, especially for *B. obeum* (HG3A.0001) which was  
237 no longer associated with SED (figure 1 and supplemental table 2). On the other hand, the negative  
238 association between SED and *F. prausnitzii* (HG3A.0025) became stronger in the BMI/WHR model.

239 To investigate the potential effect of medication usage on the associations identified in the main  
240 model (q-value <0.05), we performed further adjustment for use of proton-pump inhibitors and  
241 medications for hypertension, type 2 diabetes, dyslipidaemia, anxiety, and/or depression. After this  
242 adjustment, SED was associated (p-value < 0.05) with 187 of the 224 species associated in the main model,  
243 MPA with 205 of 245, and VPA with 169 of 228 species. In the sensitivity analysis removing 498

244 participants who had used any antibiotic in the last 3 months, SED was associated ( $p$ -value  $< 0.05$ ) with  
245 215 species, MPA with 221, and VPA with 195 (supplemental table 3). The direction of the associations  
246 did not change.

247

## 248 **Sedentary behaviour and physical activity are associated with the gut microbiota functional** 249 **potential**

250 The functional potential was determined by the abundance of previously curated functional modules,  
251 which include modules of carbohydrate, amino acid, or lipid degradation,<sup>30</sup> and modules of the microbiota-  
252 gut-brain axis.<sup>14</sup> We identified 74 functional modules associated with physical activity (supplemental table  
253 4). Out of 17 modules of carbohydrate degradation, SED was associated with lower or higher abundance  
254 of 12 modules in the main model (figure 2 and supplemental table 5). The strongest negative association  
255 was between SED and degradation of arabinoxylan, which is a dietary fibre. Even in the diet-adjusted  
256 model, SED was associated with degradation of arabinoxylan. Out of the 26 modules of amino acid  
257 degradation, SED was associated with higher abundance of 17 in the main model. In the diet-adjusted  
258 model, SED was associated with higher abundance of 15 modules of amino acid degradation, whereas  
259 MPA was associated with lower abundance of 14, and VPA with lower abundance of 7.

260 Among the modules of the microbiota-gut-brain axis, the largest main model coefficient was found  
261 for heat-shock protein ClpB, which was negatively associated with SED, and positively associated with  
262 MPA and VPA (figure 3 and supplemental table 5). Comparing main model and BMI/WHR-adjusted  
263 model associations, we observed marked differences for the butyrate synthesis I module. In the main  
264 model, VPA was positively associated with butyrate synthesis I, while no association was detected for  
265 SED or MPA. In the BMI/WHR-adjusted model, we could not detect the association for VPA; instead,  
266 SED was positively and MPA was negatively associated with this module. No association was driven by  
267 a single influential observation.

268

## 269 **DISCUSSION**

270 In this largest-to-date population-based study of physical activity with gut microbiome encompassing  
271 8507 individuals, we found that, from the 1336 species investigated, 345 (25.8%) were associated with  
272 physical activity. Overall, SED and MPA were associated with the same set of species but with regression  
273 coefficients in opposite directions. Furthermore, MPA and VPA had concordant associations with gut  
274 microbiota species, although with notable exceptions. Similar results were observed after adjustment for

275 dietary variables, but some associations for SED were markedly affected by the adjustment for  
276 BMI/WHR. Additionally, SED, MPA, and VPA were associated with specific microbial functions, some  
277 potentially involved in the microbiota-gut-brain axis.

278

### 279 **The associations of sedentary behaviour and physical activity with gut microbiota species**

280 Among the strongest findings with species-level annotation, MPA was associated with higher abundance  
281 of *P. copri* and *F. prausnitzii* (HG3A.0241 and HG3A.0025). Time spent in exercise has previously been  
282 associated with higher *P. copri* abundance in cyclists.<sup>37</sup> Nevertheless, the associations between *P. copri*  
283 and health outcomes have been inconsistent, with some studies suggesting a role in fibre fermentation and  
284 improved glucose metabolism,<sup>38</sup> while others reported associations with insulin resistance<sup>39</sup> and  
285 hypertension.<sup>40</sup> MPA and VPA had similar associations, but there were some clear exceptions. MPA was  
286 associated with higher abundance of *P. copri* and *F. prausnitzii* (HG3A.0025), and lower abundance of *B.*  
287 *uniformis* and *P. vulgatus*, while we could not detect the same associations for VPA. We found that VPA  
288 was positively associated with *Roseburia homininis* and *F. prausnitzii* (HG3A.0241), but negatively  
289 associated with another subspecies of *F. prausnitzii* (HG3A.0010). In general, *F. prausnitzii* is considered  
290 to have anti-inflammatory properties<sup>41</sup> and individuals with type 2 diabetes have been reported to have a  
291 lower abundance of this bacteria.<sup>42</sup> A higher abundance of *F. prausnitzii* and *R. hominis* has also been  
292 reported in active premenopausal women, based on accelerometer assessment.<sup>43</sup> Both *F. prausnitzii* and  
293 *R. hominis* are important producers of butyrate, which is a main energy source for colonocytes and critical  
294 for gut homeostasis.<sup>44</sup> A previous study in a small sample of young adults has also reported an association  
295 between cardiorespiratory fitness and fecal butyric acid.<sup>45</sup>

296 In the present study, SED was associated with higher abundance of *B. obeum* (HG3A.0001 and  
297 HG3A.0009), *R. torques*, *P. vulgatus*, and *Escherichia coli*. An increased abundance of the  
298 *Escherichia/Shigella* taxon was also reported in sedentary individuals in the Healthy Life in an Urban  
299 Setting cohort (HELIUS, N = 1334), the largest population-based study on physical activity and gut  
300 microbiota until the present study.<sup>22</sup> A higher abundance of *E. coli* has been observed in individuals with  
301 atherosclerotic cardiovascular disease<sup>46</sup> and users of the anti-diabetes medication metformin,<sup>47</sup> suggesting  
302 a link between physical activity, gut microbiota, and cardiometabolic diseases. Due to different microbiota  
303 profiling methods, our findings cannot be directly compared with the HELIUS study. We confirmed  
304 though the positive association between *P. copri* and physical activity but found a positive association  
305 between VPA and *R. hominis*, which was more abundant in sedentary individuals in the HELIUS study.

306 The median VPA in our study sample was only 0.06%. A previous study has suggested that as  
307 little as 15 min/week of VPA reduces the risk for all-cause mortality by 18%;<sup>48</sup> therefore, effects of VPA  
308 could be expected even with little time spent in these activities. Vigorous-intensity activities include  
309 running and high-intensity sports, while moderate-intensity activities cover a wider range of activities,  
310 including brisk walking and bicycling at low speed, but also household chores.<sup>49</sup> Future studies could  
311 further investigate the associations of subcategories of MPA with the gut microbiota.

312

### 313 **Adjustment for BMI and WHR had a pronounced effect on the associations observed between SED** 314 **and species of the gut microbiota**

315 In the models additionally adjusted for dietary variables or for BMI/WHR, we observed attenuated  
316 coefficients. The largest effect was observed for associations with SED after adjustment for BMI/WHR.  
317 This attenuation could be caused by BMI acting as a confounder or a mediator. However, for 14 species,  
318 including *F. prausnitzii* (HG3A.0025), the association with SED became stronger after BMI/WHR  
319 adjustment. This could be due to a negative confounding effect of adiposity, which masked the true  
320 associations in the main model, or that the adjustment for BMI/WHR led to collider bias. The greater  
321 impact of adjusting for BMI/WHR on SED coefficients than on MPA or VPA coefficients aligns with  
322 previous Mendelian randomization analyses, which have demonstrated stronger bidirectional effects  
323 between SED and BMI than between physical activity time and BMI.<sup>50,51</sup>

324

### 325 **Sedentary behaviour associated with higher gut microbiota capacity to degrade amino acids and to** 326 **produce certain short-chain fatty acids**

327 With regards to the functional potential of the gut microbiota, we found that SED was associated with  
328 lower capacity for fibre degradation and higher capacity for amino acid degradation. Likewise, a previous  
329 study has reported an increased abundance of carbohydrate degradation pathways in athletes.<sup>52</sup> These  
330 findings could be due to lower fibre content in the diet of sedentary individuals, which we aimed to address  
331 by adjusting for fibre intake. A lower availability of fermentable carbohydrates in the distal gut can result  
332 in a reduction in saccharolytic bacteria and an increase in proteolytic bacteria.<sup>30</sup> Intervention studies with  
333 standardized diet would be needed to disentangle physical activity associations from associations due to  
334 differences dietary intakes.

335 In our main model results, MPA was negatively associated with modules for short-chain fatty acids  
336 synthesis, more specifically acetate and propionate synthesis, while SED was positively associated with

337 these modules. Conversely, six weeks of exercise training has been reported to increase the abundance of  
338 bacterial genes involved in propionate synthesis.<sup>53</sup> The same study also reported a BMI-dependent  
339 exercise-induced increase in bacterial genes of butyrate synthesis. In our study, VPA was positively  
340 associated with butyrate synthesis in the main model, while in the BMI/WHR-adjusted model, it was SED  
341 that was positively associated with this same module. For other modules in the microbiota-gut-brain axis,  
342 SED was negatively and MPA positively associated with the module for the heat-shock protein ClpB that  
343 has been suggested to influence appetite regulation.<sup>54</sup> SED was also associated with higher abundance of  
344 the GABA synthesis module and higher abundance of *E. coli*, one of the main GABA-producing bacteria  
345 in the gut.<sup>55</sup> Although lower plasma levels of GABA have been described in individuals with depression,<sup>56</sup>  
346 recent studies found elevated levels in a mixed sample of medicated and non-medicated individuals with  
347 major depressive disorder.<sup>57,58</sup>

348

### 349 **Strengths and limitations**

350 The strengths of this study are the accelerometer-based assessment of sedentary behaviour and physical  
351 activity phenotypes, the large sample of participants from the general population, and the high taxonomic  
352 resolution microbiome data. Moreover, we had access to comprehensive information on potential  
353 confounders. Some limitations apply. One concern is whether the associations described reflect the  
354 lifestyle of health-conscious individuals. Despite covariate adjustments, it is implausible to capture all  
355 dimensions of dietary intake and residual confounding may remain. Accelerometers measure absolute  
356 physical activity intensity, but relative intensity could be more clinically relevant. Standardized  
357 accelerometer cut-offs can misclassify low and high fitness individuals. Estimating relative intensity  
358 would though require data on individual maximal capacity, such as maximal oxygen uptake.<sup>59</sup>  
359 Additionally, social desirability bias and adherence to the study instructions could affect accelerometer-  
360 based assessment. However, these misclassifications would be non-differential. The accelerometer needed  
361 to be removed during water-based activity and may also underestimate physical activity intensity during  
362 cycling, upper body activities, and weight-lifting.<sup>25</sup> Our study was conducted in a Swedish population  
363 aged 50-65, thus generalizability to other populations is limited. Additionally, we cannot assess the  
364 direction of the associations using cross-sectional data. It is suggested that gut microbiota may favour the  
365 practice of exercise by enhancing the enjoyment of physical activity<sup>60</sup> or improving the host  
366 performance.<sup>61</sup> The gut microbiota can also affect adiposity,<sup>62</sup> which is negatively associated with physical

367 activity. Lastly, the use of relative abundances incur on the issues of compositional data, which can  
368 produce false-positive associations.<sup>63</sup>

369 In summary, sedentary behaviour and physical activity were associated with a large number of gut  
370 microbiota species and functional modules. Our findings can be used to guide research on the interplay  
371 between physical activity, the gut microbiota composition, and health outcomes.

## 372 REFERENCES

- 373 1. Aune, D., Norat, T., Leitzmann, M., Tonstad, S. & Vatten, L. J. Physical activity and the risk of type  
374 2 diabetes: a systematic review and dose-response meta-analysis. *Eur. J. Epidemiol.* **30**, 529–542  
375 (2015).
- 376 2. Lear, S. A. *et al.* The effect of physical activity on mortality and cardiovascular disease in 130 000  
377 people from 17 high-income, middle-income, and low-income countries: the PURE study. *Lancet*  
378 *Lond. Engl.* **390**, 2643–2654 (2017).
- 379 3. Brown, W. J., Ford, J. H., Burton, N. W., Marshall, A. L. & Dobson, A. J. Prospective Study of  
380 Physical Activity and Depressive Symptoms in Middle-Aged Women. *Am. J. Prev. Med.* **29**, 265–272  
381 (2005).
- 382 4. Patterson, R. *et al.* Sedentary behaviour and risk of all-cause, cardiovascular and cancer mortality, and  
383 incident type 2 diabetes: a systematic review and dose response meta-analysis. *Eur. J. Epidemiol.* **33**,  
384 811–829 (2018).
- 385 5. Wilmot, E. G. *et al.* Sedentary time in adults and the association with diabetes, cardiovascular disease  
386 and death: systematic review and meta-analysis. *Diabetologia* **55**, 2895–2905 (2012).
- 387 6. Teychenne, M., Costigan, S. A. & Parker, K. The association between sedentary behaviour and risk  
388 of anxiety: a systematic review. *Bmc Public Health* **15**, 513 (2015).
- 389 7. Ekelund, U. *et al.* Do the associations of sedentary behaviour with cardiovascular disease mortality  
390 and cancer mortality differ by physical activity level? A systematic review and harmonised meta-  
391 analysis of data from 850 060 participants. *Br. J. Sports Med.* **53**, 886–894 (2019).
- 392 8. Ekelund, U. *et al.* Does physical activity attenuate, or even eliminate, the detrimental association of  
393 sitting time with mortality? A harmonised meta-analysis of data from more than 1 million men and  
394 women. *The Lancet* **388**, 1302–1310 (2016).
- 395 9. Ekelund, U. *et al.* Joint associations of accelerometer measured physical activity and sedentary time  
396 with all-cause mortality: a harmonised meta-analysis in more than 44 000 middle-aged and older  
397 individuals. *Br. J. Sports Med.* **54**, 1499–1506 (2020).

- 398 10. Qin, J. *et al.* A human gut microbial gene catalogue established by metagenomic sequencing. *Nature*  
399 **464**, 59–65 (2010).
- 400 11. Molinaro, A. *et al.* Imidazole propionate is increased in diabetes and associated with dietary patterns  
401 and altered microbial ecology. *Nat. Commun.* **11**, 5881 (2020).
- 402 12. Witkowski, M., Weeks, T. L. & Hazen, S. L. Gut Microbiota and Cardiovascular Disease. *Circ. Res.*  
403 **127**, 553–570 (2020).
- 404 13. Pinto, Y. *et al.* Gestational diabetes is driven by microbiota-induced inflammation months before  
405 diagnosis. *Gut* [gutjnl-2022-328406](https://doi.org/10.1136/gutjnl-2022-328406) (2023) doi:10.1136/gutjnl-2022-328406.
- 406 14. Valles-Colomer, M. *et al.* The neuroactive potential of the human gut microbiota in quality of life and  
407 depression. *Nat. Microbiol.* **4**, 623–632 (2019).
- 408 15. Stanich, P. P., Peck, J., Murphy, C., Porter, K. M. & Meyer, M. M. Physical activity during video  
409 capsule endoscopy correlates with shorter bowel transit time. *Endosc. Int. Open* **5**, E856–E860 (2017).
- 410 16. van Wijck, K. *et al.* Exercise-induced splanchnic hypoperfusion results in gut dysfunction in healthy  
411 men. *PloS One* **6**, e22366 (2011).
- 412 17. Wertheim, B. C. *et al.* Physical activity as a determinant of fecal bile acid levels. *Cancer Epidemiol.*  
413 *Biomark. Prev. Publ. Am. Assoc. Cancer Res. Cosponsored Am. Soc. Prev. Oncol.* **18**, 1591–1598  
414 (2009).
- 415 18. Donati Zeppa, S. *et al.* Nine weeks of high-intensity indoor cycling training induced changes in the  
416 microbiota composition in non-athlete healthy male college students. *J. Int. Soc. Sports Nutr.* **18**, 74  
417 (2021).
- 418 19. Kern, T. *et al.* Structured exercise alters the gut microbiota in humans with overweight and obesity—  
419 A randomized controlled trial. *Int. J. Obes.* **44**, 125–135 (2020).
- 420 20. Motiani, K. K. *et al.* Exercise Training Modulates Gut Microbiota Profile and Improves Endotoxemia.  
421 *Med. Sci. Sports Exerc.* **52**, 94–104 (2020).
- 422 21. Manor, O. *et al.* Health and disease markers correlate with gut microbiome composition across  
423 thousands of people. *Nat. Commun.* **11**, 5206 (2020).
- 424 22. Houttu, V. *et al.* Physical Activity and Dietary Composition Relate to Differences in Gut Microbial  
425 Patterns in a Multi-Ethnic Cohort-The HELIUS Study. *Metabolites* **11**, 858 (2021).
- 426 23. Adams, S. A. *et al.* The effect of social desirability and social approval on self-reports of physical  
427 activity. *Am. J. Epidemiol.* **161**, 389–398 (2005).

- 428 24. Bergström, G. *et al.* Prevalence of Subclinical Coronary Artery Atherosclerosis in the General  
429 Population. *Circulation* **144**, 916–929 (2021).
- 430 25. Ekblom-Bak, E. *et al.* Accelerometer derived physical activity patterns in 27.890 middle-aged adults:  
431 The SCAPIS cohort study. *Scand. J. Med. Sci. Sports* **32**, 866–880 (2022).
- 432 26. Dekkers, K. F. *et al.* An online atlas of human plasma metabolite signatures of gut microbiome  
433 composition. *Nat. Commun.* **13**, 5370 (2022).
- 434 27. Nielsen, H. B. *et al.* Identification and assembly of genomes and genetic elements in complex  
435 metagenomic samples without using reference genomes. *Nat. Biotechnol.* **32**, 822–828 (2014).
- 436 28. Spellerberg, I. F. & Fedor, P. J. A tribute to Claude Shannon (1916–2001) and a plea for more rigorous  
437 use of species richness, species diversity and the ‘Shannon–Wiener’ Index. *Glob. Ecol. Biogeogr.* **12**,  
438 177–179 (2003).
- 439 29. Bray, J. R. & Curtis, J. T. An Ordination of the Upland Forest Communities of Southern Wisconsin.  
440 *Ecol. Monogr.* **27**, 325–349 (1957).
- 441 30. Vieira-Silva, S. *et al.* Species-function relationships shape ecological properties of the human gut  
442 microbiome. *Nat. Microbiol.* **1**, 16088 (2016).
- 443 31. Darzi, Y., Falony, G., Vieira-Silva, S. & Raes, J. Towards biome-specific analysis of meta-omics data.  
444 *ISME J.* **10**, 1025–1028 (2016).
- 445 32. Christensen, S. E. *et al.* Relative Validity of Micronutrient and Fiber Intake Assessed With Two New  
446 Interactive Meal- and Web-Based Food Frequency Questionnaires. *J. Med. Internet Res.* **16**, e59  
447 (2014).
- 448 33. Christensen, S. E. *et al.* Two New Meal- and Web-Based Interactive Food Frequency Questionnaires:  
449 Validation of Energy and Macronutrient Intake. *J. Med. Internet Res.* **15**, e109 (2013).
- 450 34. Aasmets, O., Krigul, K. L., Lüll, K., Metspalu, A. & Org, E. Gut metagenome associations with  
451 extensive digital health data in a volunteer-based Estonian microbiome cohort. *Nat. Commun.* **13**, 869  
452 (2022).
- 453 35. Pearl, J. Causal Diagrams for Empirical Research. *Biometrika* **82**, 669–688 (1995).
- 454 36. Benjamini, Y. & Hochberg, Y. Controlling the False Discovery Rate: A Practical and Powerful  
455 Approach to Multiple Testing. *J. R. Stat. Soc. Ser. B Methodol.* **57**, 289–300 (1995).
- 456 37. Petersen, L. M. *et al.* Community characteristics of the gut microbiomes of competitive cyclists.  
457 *Microbiome* **5**, 98 (2017).



- 458 38. Kovatcheva-Datchary, P. *et al.* Dietary Fiber-Induced Improvement in Glucose Metabolism Is  
459 Associated with Increased Abundance of *Prevotella*. *Cell Metab.* **22**, 971–982 (2015).
- 460 39. Pedersen, H. K. *et al.* Human gut microbes impact host serum metabolome and insulin sensitivity.  
461 *Nature* **535**, 376–381 (2016).
- 462 40. Li, J. *et al.* Gut microbiota dysbiosis contributes to the development of hypertension. *Microbiome* **5**,  
463 14 (2017).
- 464 41. Breyner, N. M. *et al.* Microbial Anti-Inflammatory Molecule (MAM) from *Faecalibacterium*  
465 *prausnitzii* Shows a Protective Effect on DNBS and DSS-Induced Colitis Model in Mice through  
466 Inhibition of NF- $\kappa$ B Pathway. *Front. Microbiol.* **8**, 114 (2017).
- 467 42. Qin, J. *et al.* A metagenome-wide association study of gut microbiota in type 2 diabetes. *Nature* **490**,  
468 55–60 (2012).
- 469 43. Bressa, C. *et al.* Differences in gut microbiota profile between women with active lifestyle and  
470 sedentary women. *PLOS ONE* **12**, e0171352 (2017).
- 471 44. Donohoe, D. R. *et al.* The Microbiome and Butyrate Regulate Energy Metabolism and Autophagy in  
472 the Mammalian Colon. *Cell Metab.* **13**, 517–526 (2011).
- 473 45. Estaki, M. *et al.* Cardiorespiratory fitness as a predictor of intestinal microbial diversity and distinct  
474 metagenomic functions. *Microbiome* **4**, 42 (2016).
- 475 46. Jie, Z. *et al.* The gut microbiome in atherosclerotic cardiovascular disease. *Nat. Commun.* **8**, 845  
476 (2017).
- 477 47. Wu, H. *et al.* Metformin alters the gut microbiome of individuals with treatment-naive type 2 diabetes,  
478 contributing to the therapeutic effects of the drug. *Nat. Med.* **23**, 850–858 (2017).
- 479 48. Ahmadi, M. N. *et al.* Vigorous physical activity, incident heart disease, and cancer: how little is  
480 enough? *Eur. Heart J.* **43**, 4801–4814 (2022).
- 481 49. Ainsworth, B. E. *et al.* 2011 Compendium of Physical Activities: A Second Update of Codes and  
482 MET Values. *Med. Sci. Sports Exerc.* **43**, 1575–1581 (2011).
- 483 50. Carrasquilla, G. D., García-Ureña, M., Fall, T., Sørensen, T. I. A. & Kilpeläinen, T. O. Mendelian  
484 randomization suggests a bidirectional, causal relationship between physical inactivity and adiposity.  
485 *eLife* **11**, e70386 (2022).
- 486 51. Wang, Z. *et al.* Genome-wide association analyses of physical activity and sedentary behavior provide  
487 insights into underlying mechanisms and roles in disease prevention. *Nat. Genet.* **54**, 1332–1344  
488 (2022).

- 489 52. Barton, W. *et al.* The microbiome of professional athletes differs from that of more sedentary subjects  
490 in composition and particularly at the functional metabolic level. *Gut* **67**, 625–633 (2018).
- 491 53. Allen, J. M. *et al.* Exercise Alters Gut Microbiota Composition and Function in Lean and Obese  
492 Humans. *Med. Sci. Sports Exerc.* **50**, 747–757 (2018).
- 493 54. Tennoune, N. *et al.* Bacterial ClpB heat-shock protein, an antigen-mimetic of the anorexigenic peptide  
494  $\alpha$ -MSH, at the origin of eating disorders. *Transl. Psychiatry* **4**, e458 (2014).
- 495 55. Strandwitz, P. *et al.* GABA-modulating bacteria of the human gut microbiota. *Nat. Microbiol.* **4**, 396–  
496 403 (2019).
- 497 56. Petty, F., Kramer, G. L., Gullion, C. M. & Rush, A. J. Low plasma gamma-aminobutyric acid levels  
498 in male patients with depression. *Biol. Psychiatry* **32**, 354–363 (1992).
- 499 57. Bhandage, A. K. *et al.* Depression, GABA, and Age Correlate with Plasma Levels of Inflammatory  
500 Markers. *Int. J. Mol. Sci.* **20**, 6172 (2019).
- 501 58. Pan, J.-X. *et al.* Diagnosis of major depressive disorder based on changes in multiple plasma  
502 neurotransmitters: a targeted metabolomics study. *Transl. Psychiatry* **8**, 1–10 (2018).
- 503 59. Warner, A., Vanicek, N., Benson, A., Myers, T. & Abt, G. Agreement and relationship between  
504 measures of absolute and relative intensity during walking: A systematic review with meta-regression.  
505 *PloS One* **17**, e0277031 (2022).
- 506 60. Dohnalová, L. *et al.* A microbiome-dependent gut-brain pathway regulates motivation for exercise.  
507 *Nature* **612**, 739–747 (2022).
- 508 61. Scheiman, J. *et al.* Meta-omics analysis of elite athletes identifies a performance-enhancing microbe  
509 that functions via lactate metabolism. *Nat. Med.* **25**, 1104–1109 (2019).
- 510 62. Turnbaugh, P. J. *et al.* An obesity-associated gut microbiome with increased capacity for energy  
511 harvest. *Nature* **444**, 1027–1031 (2006).
- 512 63. Gloor, G. B., Macklaim, J. M., Pawlowsky-Glahn, V. & Egozcue, J. J. Microbiome Datasets Are  
513 Compositional: And This Is Not Optional. *Front. Microbiol.* **8**, (2017).

514

515

516

### 517 **Contributorship**

518 JGS, GBergström, LL, GE, JÄ, MO-M and TF obtained the funding for the study. GBaldanzi, SS-B, EEB,  
519 ÖK, UH, BK, and TF planned and designed the study. GBaldanzi carried out the statistical analyses with  
520 contribution from SS-B, KFD, and UH. GBaldanzi wrote the first version of the manuscript with support

521 from SS-B, BK, and TF. All authors contributed with the critical interpretation of the results and revision  
522 of the manuscript.

523

#### 524 **Funding/support**

525 Financial support was obtained in the form of grants from the European Research Council [ERC-STG-  
526 2018-801965 (TF); ERC-CoG-2014-649021 (MO-M); ERC-STG-2015-679242 (JGS)], the Swedish  
527 Heart-Lung Foundation [Hjärt-Lungfonden, 2019-0505 (TF); 2018-0343 (JÄ); 2020-0711 (MO-M);  
528 2020-0173 (GE); 2019-0526 (JGS)], the Swedish Research Council [VR, 2019-01471 (TF), 2018-02784  
529 (MO-M), 2019-01015 (JÄ), 2020-00243 (JÄ), 2019-01236 (GE), 2021-02273 (JGS), 2018-02837 (  
530 EXODIAB 2009-1039)], the Swedish Research Council for Sustainable Development [FORMAS, 2020-  
531 00989 (SA)], EASD/Novo Nordisk (SA), Göran Gustafsson foundation [2016 (TF)], Axel and Signe  
532 Lagerman's foundation (TF), the A.L.F. governmental grant 2018-0148 (MO-M), The Novo Nordic  
533 Foundation NNF20OC0063886 (MO-M), The Swedish Diabetes Foundation DIA 2018-375 (MO-M), the  
534 Skandia Risk&Hälsa, 2023 (ÖE, EEB), and governmental funding of clinical research within the Swedish  
535 National Health Service (JGS). The study was also supported by the Swedish Foundation for Strategic  
536 Research (LUDC-IRC 15-0067). Funding for the SCAPIS study was provided by the Swedish Heart-Lung  
537 Foundation, the Knut and Alice Wallenberg Foundation, the Swedish Research Council and VINNOVA  
538 (Sweden's Innovation agency), the University of Gothenburg and Sahlgrenska University Hospital,  
539 Karolinska Institutet and Stockholm County council, Linköping University and University Hospital, Lund  
540 University and Skåne University Hospital, Umeå University and University Hospital, Uppsala University  
541 and University Hospital.

542

#### 543 **Competing interests**

544 J.Ä. has served on the advisory boards for Astella, AstraZeneca and Boehringer Ingelheim and has  
545 received lecturing fees from AstraZeneca and Novartis, all unrelated to the present work. Remaining  
546 authors declare no competing interests.

547

548

#### 549 **Acknowledgments**

550 We acknowledge the SCAPIS board for enabling the current study, along with the Swedish Heart-Lung  
551 Foundation, the main funding body of SCAPIS. The computations and data handling were enabled by  
552 resources in project sens2019512 provided by the National Academic Infrastructure for Supercomputing

553 in Sweden (NAISS) and the Swedish National Infrastructure for Computing (SNIC) at Uppsala  
554 Multidisciplinary Center for Advanced Computational Science (UPPMAX), funded by the Swedish  
555 Research Council through grant agreement no. 2018-0597 and no. 2022-06725.

556

557

### 558 **Data Sharing**

559 The de-identified metagenomic sequences can be found in the European Nucleotide Archive under the  
560 accession code “PRJEB51353”. The statistical analyses R codes can be found at  
561 [https://github.com/MolEpicUU/physicalactivity\\_gut](https://github.com/MolEpicUU/physicalactivity_gut). The individual-level data underlying this article  
562 were provided by the SCAPIS study and are not shared publicly due to confidentiality. Data will be shared  
563 upon reasonable request to the corresponding author only after permission by the Swedish Ethical Review  
564 Authority (<https://etikprovningssmyndigheten.se>) and by the SCAPIS Data access board  
565 (<https://www.scapis.org/data-access/>).

566

567 **FIGURES**

568 **Figure 1**

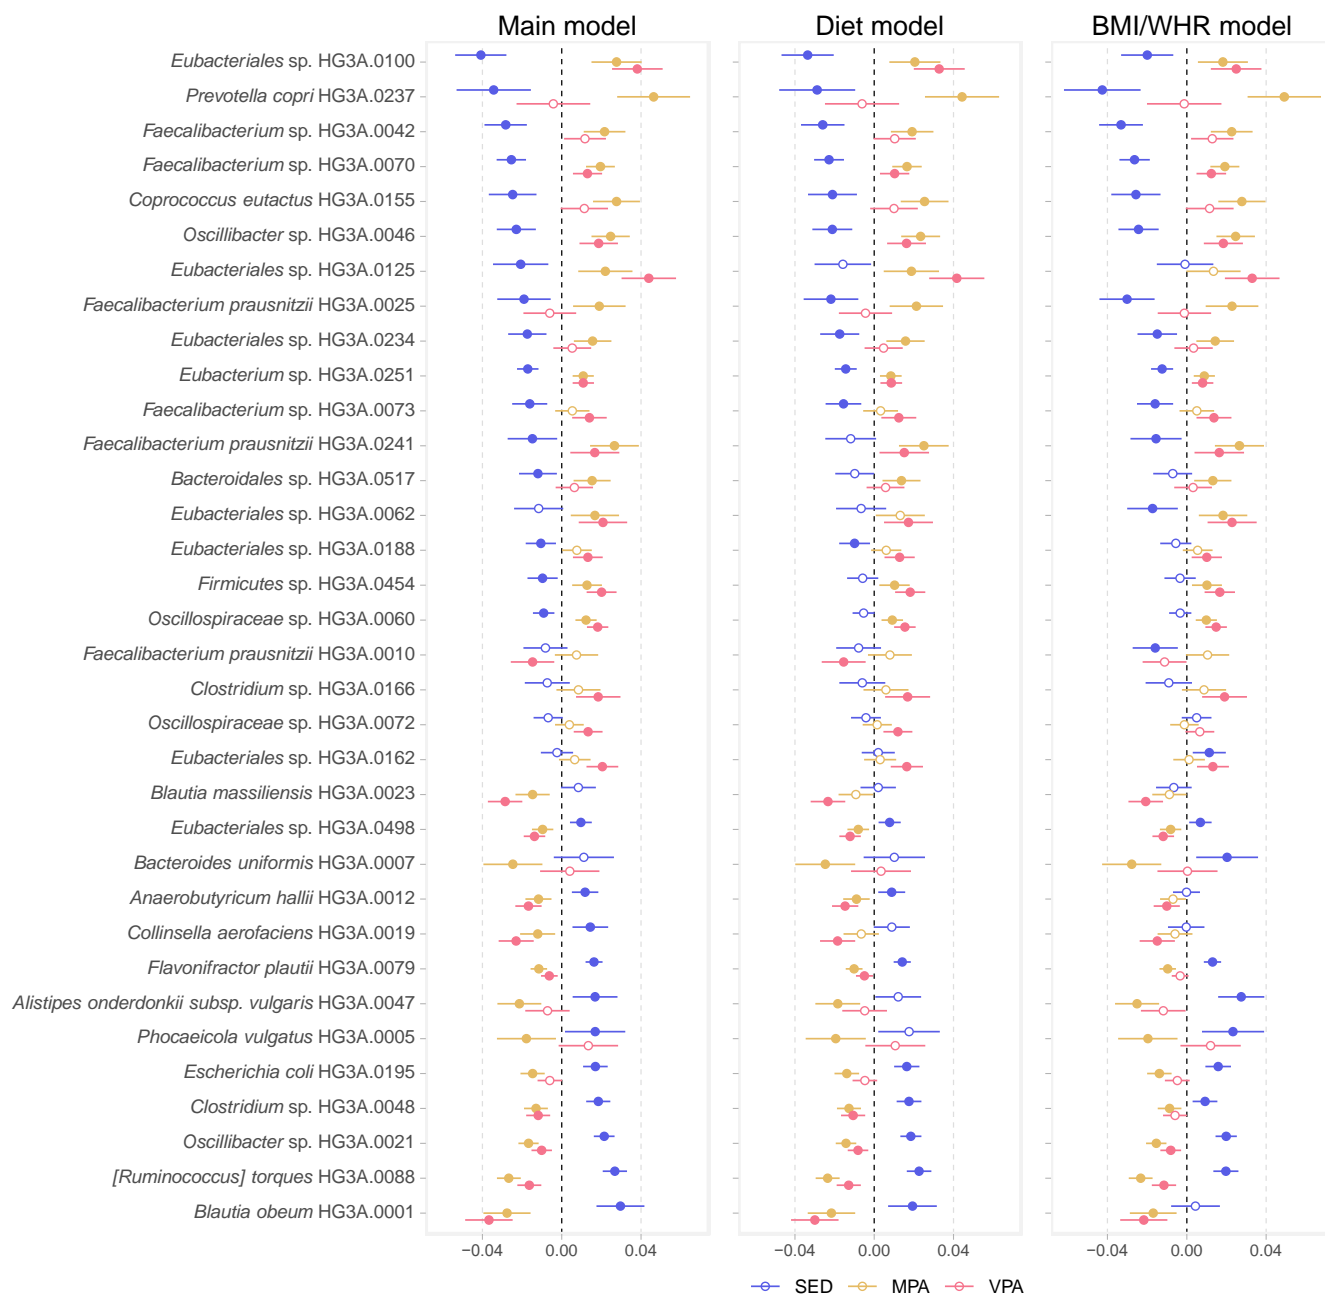

569

570 **Figure 1.** Top 20 associations based on the absolute regression coefficients for SED, MPA, and VPA with  
 571 gut microbiota species. Effect estimates show changes in the log(relative abundance+1) of species by  
 572 standard-deviation changes in SED, MPA, or VPA. Main model: adjustment for age, sex, alcohol intake,  
 573 smoking, education, country of birth, study site, month of accelerometer wear, total accelerometer wear  
 574 time, percentage of wear time on weekend, and fecal DNA extraction plate. Diet model: main model with  
 575 additional adjustment for total energy intake, and percentage of energy intake from carbohydrates, protein,

576 fibers, and added sugars. BMI/WHR model: main model with additional adjustment for BMI and waist-  
577 hip ratio. Circles are the regression coefficients and bars represent the 95% confidence intervals. Filled  
578 circles are associations with q-values <0.05. SED: percentage of time in sedentary behaviour; MPA:  
579 percentage of time in moderate-intensity physical activity; VPA: percentage of time in vigorous-intensity  
580 physical activity.

581

582

583 **Figure 2**

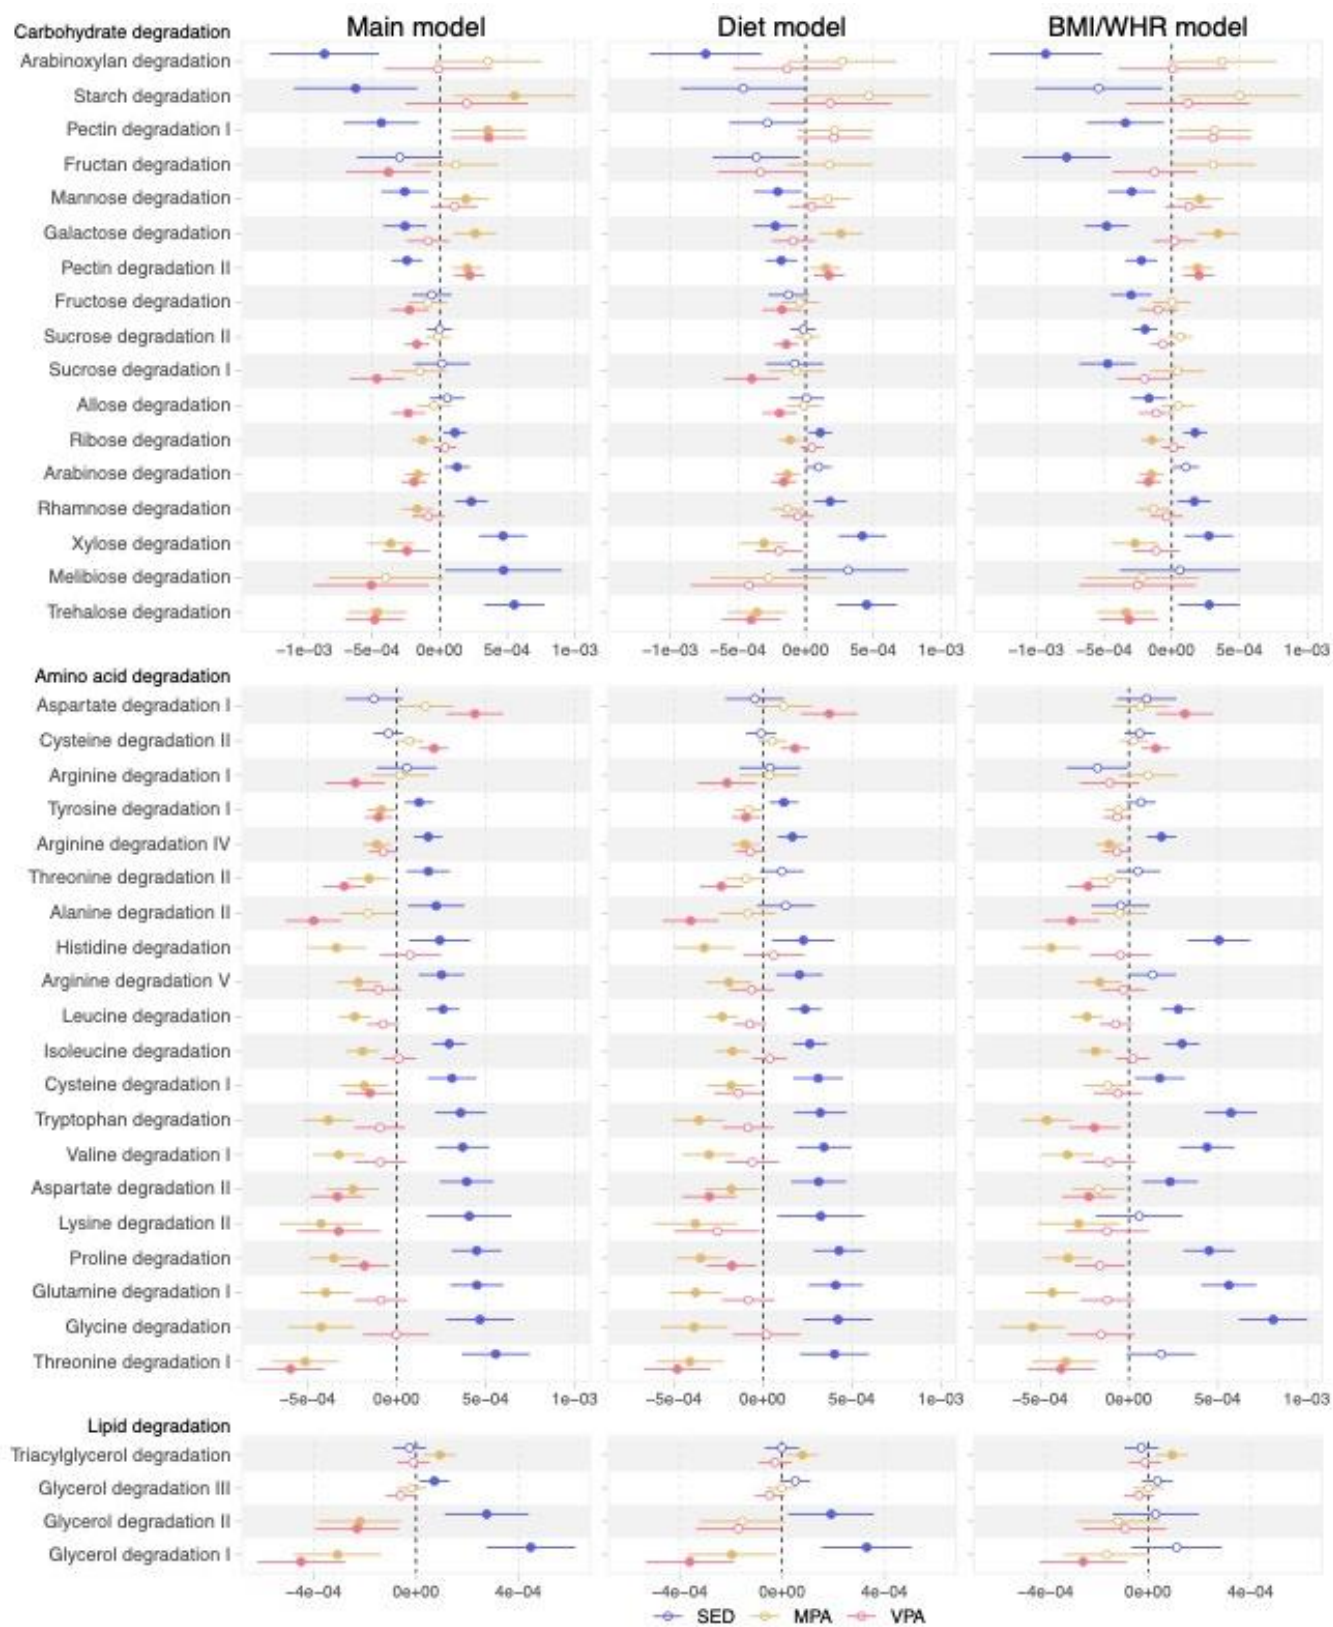

584

585 **Figure 2.** Associations of SED, MPA and VPA with functional modules of carbohydrate, amino acid, and  
586 lipid degradation. Effect estimates show changes in the log(relative abundance+1) of modules by standard-  
587 deviation change in SED, MPA, or VPA. Main model: adjustment for age, sex, alcohol intake, smoking,  
588 education, country of birth, study site, month of accelerometer wear, total accelerometer wear time,  
589 percentage of wear time on weekend, and fecal DNA extraction plate. Diet model: main model with  
590 additional adjustment for total energy intake, and percentage of energy intake from carbohydrates, protein,  
591 fibers, and added sugars. BMI/WHR model: main model with additional adjustment for BMI and waist-  
592 hip ratio. Circles are the regression coefficients and bars represent the 95% confidence intervals. Filled  
593 circles are associations with q-values <0.05. SED: percentage of time in sedentary behaviour; MPA:  
594 percentage of time in moderate-intensity physical activity; VPA: percentage of time in vigorous-intensity  
595 physical activity.  
596



597 **Figure 3**

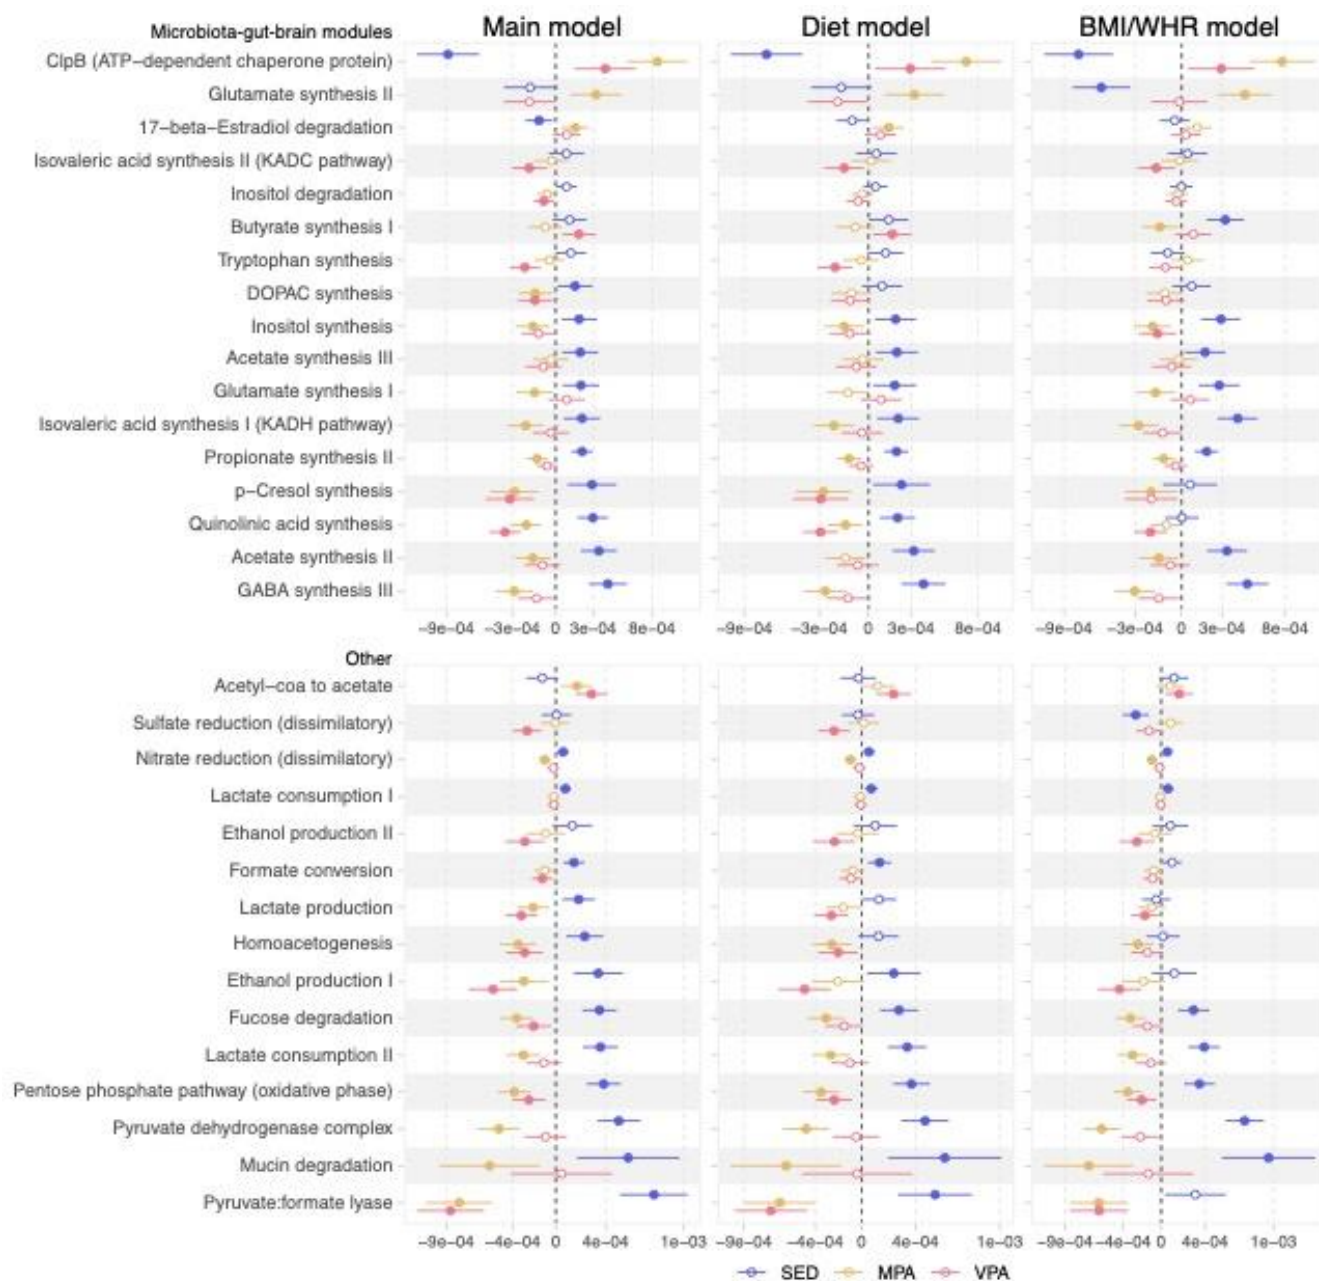

598

599 **Figure 3.** Associations of SED, MPA and VPA with microbiota-gut-brain modules and other functional  
600 modules. Effect estimates show changes in the log(relative abundance+1) of modules by standard-  
601 deviation change in SED, MPA, or VPA. Main model: adjustment for age, sex, alcohol intake, smoking,  
602 education, country of birth, study site, month of accelerometer wear, total accelerometer wear time,  
603 percentage of wear time on weekend, and fecal DNA extraction plate. Diet model: main model with  
604 additional adjustment for total energy intake, and percentage of energy intake from carbohydrates,  
605 protein, fibers, and added sugars. BMI/WHR model: main model with additional adjustment for BMI and waist-  
606 hip ratio. Circles are the regression coefficients and bars represent the 95% confidence intervals. Filled

607 circles are associations with q-values  $<0.05$ . SED: percentage of time in sedentary behaviour; MPA:  
608 percentage of time in moderate-intensity physical activity; VPA: percentage of time in vigorous-intensity  
609 physical activity.
